# Supplementary material for: Hospital, health, and community burden after oil refinery fires, Richmond, California 2007 and 2012
Source: PubMed Central journal article supplement (PMC6524223; doi:10.1186/s12940-019-0484-4), 2019-05-16
Supplement: 12940_2019_484_MOESM2_ESM.pdf [file 12940_2019_484_MOESM2_ESM.pdf]

## Short list of principal diagnosis groups, 500 or more cases, 2012 CRI

| Body System                                                                      | Diagnosis group   | Principal Diagnosis (N) |       |       | Patient Percent |       | Difference |      | Rel Risk |
|----------------------------------------------------------------------------------|-------------------|-------------------------|-------|-------|-----------------|-------|------------|------|----------|
|                                                                                  |                   | Before                  | After | Total | Before          | After | Abs        | Pct  |          |
| 06 Nervous system/sens                                                           | 0084 Headache/mig | 656                     | 2,828 | 3,484 | 2.7             | 7.2   | 4.6        | 81.2 | 4.31     |
|                                                                                  | 0090 Eye infectn  | 182                     | 1,153 | 1,335 | 0.7             | 3.0   | 2.2        | 86.4 | 6.34     |
|                                                                                  | 0091 Other eye dx | 105                     | 1,170 | 1,275 | 0.4             | 3.0   | 2.6        | 91.8 | 11.14    |
|                                                                                  | 0093 Dizziness    | 283                     | 481   | 764   | 1.2             | 1.2   | 0.1        | 63.0 | 1.70     |
|                                                                                  | 0095 Oth nerv dx  | 339                     | 410   | 749   | 1.4             | 1.1   | (0.3)      | 54.7 | 1.21     |
| 07 Circulatory system                                                            | 0102 Chest pain   | 913                     | 1,372 | 2,285 | 3.7             | 3.5   | (0.2)      | 60.0 | 1.50     |
| 08 Respiratory system                                                            | 0126 Ot up rsp in | 620                     | 1,332 | 1,952 | 2.5             | 3.4   | 0.9        | 68.2 | 2.15     |
|                                                                                  | 0128 Asthma       | 279                     | 806   | 1,085 | 1.1             | 2.1   | 0.9        | 74.3 | 2.89     |
|                                                                                  | 0133 Oth low resp | 452                     | 2,047 | 2,499 | 1.8             | 5.2   | 3.4        | 81.9 | 4.53     |
|                                                                                  | 0134 Ot uppr resp | 172                     | 1,171 | 1,343 | 0.7             | 3.0   | 2.3        | 87.2 | 6.81     |
| 16 Injury/poisoning                                                              | 0243 Poiso nonmed | 59                      | 3,065 | 3,124 | 0.2             | 7.9   | 7.6        | 98.1 | 51.95    |
|                                                                                  | 0244 Other injury | 843                     | 1,112 | 1,955 | 3.4             | 2.8   | (0.6)      | 56.9 | 1.32     |
| 17 Symptoms; signs; ill-defined conditions and factors influencing health status | 0246 FUO          | 218                     | 462   | 680   | 1.1             | 2.1   | 1.0        | 67.9 | 2.12     |
|                                                                                  | 0250 Nausea/vomit | 361                     | 648   | 1,009 | 1.5             | 1.7   | 0.2        | 64.2 | 1.80     |
|                                                                                  | 0255 Social admin | 383                     | 1,020 | 1,403 | 1.6             | 2.6   | 1.0        | 72.7 | 2.66     |
|                                                                                  | 0259 Unclassified | 258                     | 530   | 788   | 1.1             | 1.4   | 0.3        | 67.3 | 2.05     |
